# Supplementary material for: Discontinuous spread of millet agriculture in eastern Asia and prehistoric population dynamics
Source: PubMed Central journal article supplement — Sci Adv. 2019 Sep 25;5(9):eaax6225. doi: 10.1126/sciadv.aax6225 (PMC6760930; doi:10.1126/sciadv.aax6225), 2019-09-25
Supplement: aax6225_SM.pdf [file aax6225_SM.pdf]

## Supplementary Materials for

### **Discontinuous spread of millet agriculture in eastern Asia and prehistoric population dynamics**

C. Leipe\*, T. Long, E. A. Sergusheva, M. Wagner\*, P. E. Tarasov

\*Corresponding author. Email: [c.leipe@fu-berlin.de](mailto:c.leipe@fu-berlin.de) (C.L.); [mayke.wagner@dainst.de](mailto:mayke.wagner@dainst.de) (M.W.)

Published 25 September 2019, *Sci. Adv.* **5**, eaax6225 (2019)  
DOI: 10.1126/sciadv.aax6225

#### **This PDF file includes:**

Fig. S1. Bayesian model structure and OxCal coding.  
Fig. S2. OxCal modeling results.

#### **Other Supplementary Material for this manuscript includes the following:**

(available at [advances.sciencemag.org/cgi/content/full/5/9/eaax6225/DC1](https://advances.sciencemag.org/cgi/content/full/5/9/eaax6225/DC1))

Table S1 (Microsoft Excel format). Available  $^{14}\text{C}$  dates directly derived from remains of domesticated millet extracted from the literature.

Table S2 (Microsoft Excel format). Newly obtained  $^{14}\text{C}$  dates directly derived from remains of domesticated millet from prehistoric cultural layers in the Khanka-Ussuri region and the Chinese province of Shandong.

A

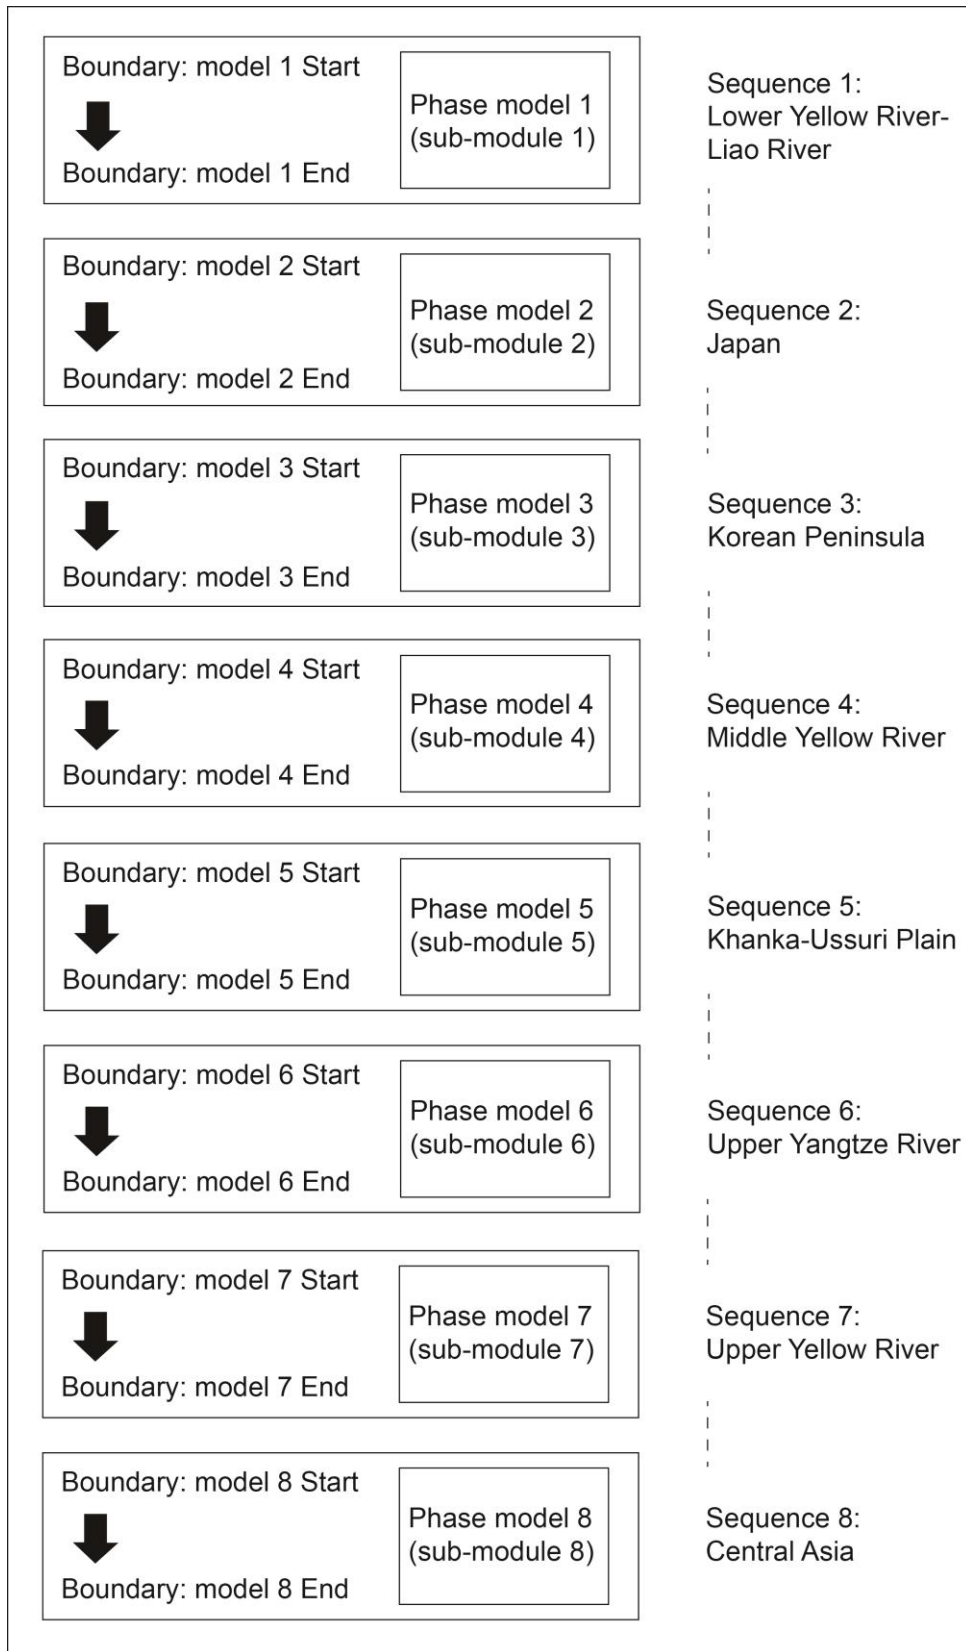

## **B**

Options()

```
{  
  kIterations=1000;  
};
```

Plot()

```
{  
  Phase()  
  {  
    Sequence("Full_model_Lower_Yellow_River_Liao_River")  
    {  
      Boundary("Lower_Yellow_River_Liao_River_start",U(-9650,1950))  
      {  
        color="Red";  
      };  
    }  
    Phase("Lower_Yellow_River_Liao_River")  
    {  
      R_Date("BA-81608", 6900, 35);  
      R_Date("Beta-456255", 6810, 30);  
      R_Date("TO-12031", 6800, 35);  
      R_Date("BA08804", 5550, 40);  
      R_Date("BA08819", 5550, 35);  
      R_Date("Beta-392668", 5390, 30);  
      R_Date("BA08803", 5220, 35);  
      R_Date("BA08805", 5195, 40);  
      R_Date("Beta-325973", 4980, 40);  
      R_Date("BK92065", 4950, 85);  
      R_Date("Poz-47621", 4695, 35);  
      R_Date("BA08811", 4690, 40);  
      R_Date("Poz-47617", 4690, 35);  
      R_Date("BA08809", 4685, 35);  
      R_Date("Poz-47622", 4660, 35);  
      R_Date("BA08807", 4655, 40);
```

R\_Date("BA08815", 4645, 40);  
R\_Date("Poz-47625", 4640, 30);  
R\_Date("Poz-47623", 4570, 40);  
R\_Date("Poz-47618", 4555, 35);  
R\_Date("BA08814", 4535, 35);  
R\_Date("BA08816", 4530, 35);  
R\_Date("BA08818", 4505, 35);  
R\_Date("BA08810", 4480, 45);  
R\_Date("Poz-47619", 4470, 40);  
R\_Date("TO11417", 4330, 70);  
R\_Date("SNU04-537", 4260, 50);  
R\_Date("Beta-325971", 4160, 40);  
R\_Date("Poz-82357", 4015, 35);  
R\_Date("ZK-0415", 3990, 90);  
R\_Date("Poz-82355", 3965, 35);  
R\_Date("Beta-325968", 3910, 30);  
R\_Date("Beta-325964", 3870, 30);  
R\_Date("Poz-82373", 3825, 30);  
R\_Date("Beta-325173", 3800, 30);  
R\_Date("Poz-82353", 3765, 30);  
R\_Date("TO11418", 3740, 70);  
R\_Date("Beta-333381", 3710, 30);  
R\_Date("Poz-82364", 3690, 35);  
R\_Date("Poz-82361", 3655, 35);  
R\_Date("Beta-333383", 3650, 30);  
R\_Date("TO11419", 3600, 70);  
R\_Date("SNU04-986", 3590, 60);  
R\_Date("SNU05131", 3590, 40);  
R\_Date("SNU04-536", 3510, 40);  
R\_Date("BA06498", 3455, 55);  
R\_Date("Beta-394222", 3450, 30);  
R\_Date("BA06500", 3425, 35);  
R\_Date("BA06499", 3415, 35);

```

R_Date("Beta-383366", 3360, 30);
R_Date("Beta-382772", 3340, 30);
R_Date("Beta-421461", 3280, 30);
R_Date("Beta-334923", 3210, 30);
R_Date("Poz-82366", 3105, 35);
R_Date("SNU04-985", 3060, 50);
R_Date("Beta-333386", 3030, 30);
R_Date("Beta-333385", 2950, 30);
R_Date("SNU04-538", 2940, 40);
R_Date("BA081054", 2935, 35);
R_Date("Beta-386787", 2880, 30);
R_Date("Beta-394223", 2690, 30);
R_Date("Beta-333382", 2540, 30);
R_Date("Beta-392664", 2410, 30);
R_Date("PV-0283", 2270, 80);
R_Date("BK75005", 900, 85);
};
Boundary("Lower_Yellow_River_Liao_River_end",U(-9650,1950))
{
  color="Red";
};
};
Sequence("Full_model_Japan")
{
  Boundary("Japan_start",U(-9650,1950))
  {
    color="Red";
  };
  Phase("Japan")
  {
    R_Date("PLD-5304", 2550, 25);
    R_Date("?", 2530, 20);
    R_Date("PLD-5106", 2230, 20);
  };
};

```

```

R_Date("PLD-6466", 2185, 35);
R_Date("TO-1998", 1160, 80);
};
Boundary("Japan_end",U(-9650,1950))
{
  color="Red";
};
};
Sequence("Full_model_Korean_Peninsula")
{
  Boundary("Korean_Peninsula_start",U(-9650,1950))
  {
    color="Red";
  };
  Phase("Korean_Peninsula")
  {
    R_Date("Beta-252973", 4770, 40);
    R_Date("TO8783", 4590, 100);
    R_Date("Beta-252972", 4340, 40);
    R_Date("TO8608", 4060, 140);
    R_Date("TO8607", 4030, 100);
    R_Date("UCIAMS67219", 3940, 20);
    R_Date("SNU07-543", 3090, 60);
    R_Date("TO8612", 2840, 60);
    R_Date("SNU-126", 2830, 60);
    R_Date("TO8637", 2800, 100);
  };
  Boundary("Korean_Peninsula_end",U(-9650,1950))
  {
    color="Red";
  };
};
};
Sequence("Full_model_Middle_Yellow_River")

```

```
{
Boundary("Middle_Yellow_River_start",U(-9650,1950))
{
color="Red";
};
Phase("Middle_Yellow_River")
{
R_Date("Beta-425889", 5680, 30);
R_Date("Beta-450597", 5350, 30);
R_Date("BA130921", 4685, 30);
R_Date("Beta-422852", 4410, 30);
R_Date("BA130922", 4340, 30);
R_Date("BA131926", 4305, 40);
R_Date("BA130790", 4265, 25);
R_Date("Beta-333389", 4180, 30);
R_Date("Beta-411769", 4160, 30);
R_Date("Beta-333387", 4150, 30);
R_Date("Beta-465234", 4090, 30);
R_Date("Beta-333388", 4070, 30);
R_Date("BA131927", 3925, 25);
R_Date("BA130789", 3820, 25);
R_Date("BA130787", 3770, 30);
R_Date("Beta-473868", 3760, 30);
R_Date("Beta-486921", 3750, 30);
R_Date("Beta-486923", 3730, 30);
R_Date("Beta-486922", 3700, 30);
R_Date("Beta-427728", 3680, 30);
R_Date("BK84077", 3550, 90);
R_Date("SA97030", 2900, 50);
R_Date("ZK-5724", 2860, 33);
R_Date("SA97029", 2850, 50);
};
Boundary("Middle_Yellow_River_end",U(-9650,1950))
```

```
{
  color="Red";
};
};
Sequence("Full_model_Khanka_Ussuri_Plain")
{
  Boundary("Khanka_Ussuri_Plain_start",U(-9650,1950))
  {
    color="Red";
  };
  Phase("Khanka_Ussuri_Plain")
  {
    R_Date("Poz-99460", 4130, 35);
    R_Date("Poz-99527", 3935, 30);
    R_Date("Poz-99525", 3925, 30);
    R_Date("Poz-99526", 3925, 30);
    R_Date("Poz-96977", 3885, 35);
    R_Date("TKa-14081", 3840, 35);
    R_Date("SNU04-192", 3090, 50);
    R_Date("TKa-13487", 3015, 50);
    R_Date("Poz-99459", 2945, 30);
    R_Date("Poz-99528", 2930, 30);
    R_Date("ZK-0085", 1650, 85);
    R_Date("TKa-13489", 1310, 45);
    R_Date("TKa-13488", 1310, 50);
  };
  Boundary("Khanka_Ussuri_Plain_end",U(-9650,1950))
  {
    color="Red";
  };
};
Sequence("Full_model_Upper_Yangtze_River")
{
```



```
Boundary("Upper_Yangtze_River_start",U(-9650,1950))
```

```
{
```

```
  color="Red";
```

```
};
```

```
Phase("Upper_Yangtze_River")
```

```
{
```

```
  R_Date("BA141207", 4520, 25);
```

```
  R_Date("BA141209", 4470, 25);
```

```
  R_Date("BA141211", 4470, 30);
```

```
  R_Date("BA141208", 4405, 35);
```

```
  R_Date("BA141210", 4240, 35);
```

```
  R_Date("BA120249", 4220, 35);
```

```
  R_Date("BA111228", 4115, 25);
```

```
  R_Date("SUERC- 73802", 4110, 34);
```

```
  R_Date("BA111229", 3995, 25);
```

```
  R_Date("Beta325960", 3980, 40);
```

```
  R_Date("SUERC-73806", 3929, 23);
```

```
  R_Date("BA111226", 3910, 25);
```

```
  R_Date("2010YMDT18-9-S1 ", 3665, 40);
```

```
  R_Date("BA081101", 3550, 40);
```

```
  R_Date("T1003-8-S2", 3275, 35);
```

```
  R_Date("T1003-9-S2", 3230, 40);
```

```
  R_Date("T1004-7-S3", 3210, 30);
```

```
  R_Date("T1004-6-S3", 3050, 30);
```

```
  R_Date("BA081100", 2940, 35);
```

```
  R_Date("T100454-S6", 2435, 30);
```

```
};
```

```
Boundary("Upper_Yangtze_River_end",U(-9650,1950))
```

```
{
```

```
  color="Red";
```

```
};
```

```
};
```

```
Sequence("Full_model_Upper_Yellow_River")
```

```
{
Boundary("Upper_Yellow_River_start",U(-9650,1950))
{
color="Red";
};
Phase("Upper_Yellow_River")
{
R_Date("BA120182 ", 4530, 60);
R_Date("TKa13889", 4490, 35);
R_Date("BA120197", 4470, 25);
R_Date("Beta-297655", 4410, 40);
R_Date("BA110889", 4395, 40);
R_Date("BA110899", 4370, 25);
R_Date("Beta-292120", 4340, 41);
R_Date("Beta-292119", 4340, 40);
R_Date("Beta-292122", 4340, 40);
R_Date("BA110882", 4300, 25);
R_Date("BA110907", 4245, 30);
R_Date("BA110909", 4185, 25);
R_Date("BA110886", 4185, 35);
R_Date("BA110908", 4135, 25);
R_Date("ZK-0522", 4110, 95);
R_Date("Beta-24458", 4110, 30);
R_Date("BA120187", 4035, 30);
R_Date("BA120201", 3980, 25);
R_Date("BA120189", 3940, 25);
R_Date("Beta-314721", 3900, 30);
R_Date("BA110866", 3870, 30);
R_Date("BA110906", 3840, 25);
R_Date("OZK666", 3795, 50);
R_Date("BA120202", 3755, 25);
R_Date("OZM453", 3750, 35);
R_Date("BA110912", 3715, 25);
```

```
R_Date("BA110887", 3690, 30);
R_Date("BA120204", 3680, 25);
R_Date("BA110905", 3680, 25);
R_Date("Beta-314717", 3640, 30);
R_Date("Beta-303694", 3640, 30);
R_Date("BA120217", 3630, 30);
R_Date("BA110883", 3610, 20);
R_Date("BA110879", 3600, 25);
R_Date("BA110904", 3595, 25);
R_Date("BA120199", 3410, 30);
};
Boundary("Upper_Yellow_River_end",U(-9650,1950))
{
  color="Red";
};
};
Sequence("Full_model_Central_Asia")
{
  Boundary("Central_Asia_start",U(-9650,1950))
  {
    color="Red";
  };
  Phase("Central_Asia")
  {
    R_Date("Beta-266458", 3840, 40);
    R_Date("BA05804", 3545, 40);
    R_Date("OS-92541", 3370, 25);
    R_Date("UBA-21939", 3330, 33);
    R_Date("BA05796", 3290, 40);
    R_Date("BA05793", 3240, 40);
    R_Date("BA05795", 3200, 40);
    R_Date("WB82-29", 3090, 90);
    R_Date("UBA-21941", 2091, 29);
```

```
R_Date("UBA-21942", 2004, 29);  
R_Date("UBA-21945", 1844, 32);  
};  
Boundary("Central_Asia_end",U(-9650,1950))  
{  
  color="Red";  
};  
};  
};  
};
```

**Fig. S1. Bayesian model structure and OxCal coding.** (A) Bayesian model structure and (B) coding employed in OxCal v4.2.3 (<https://c14.arch.ox.ac.uk/oxcal.html>).

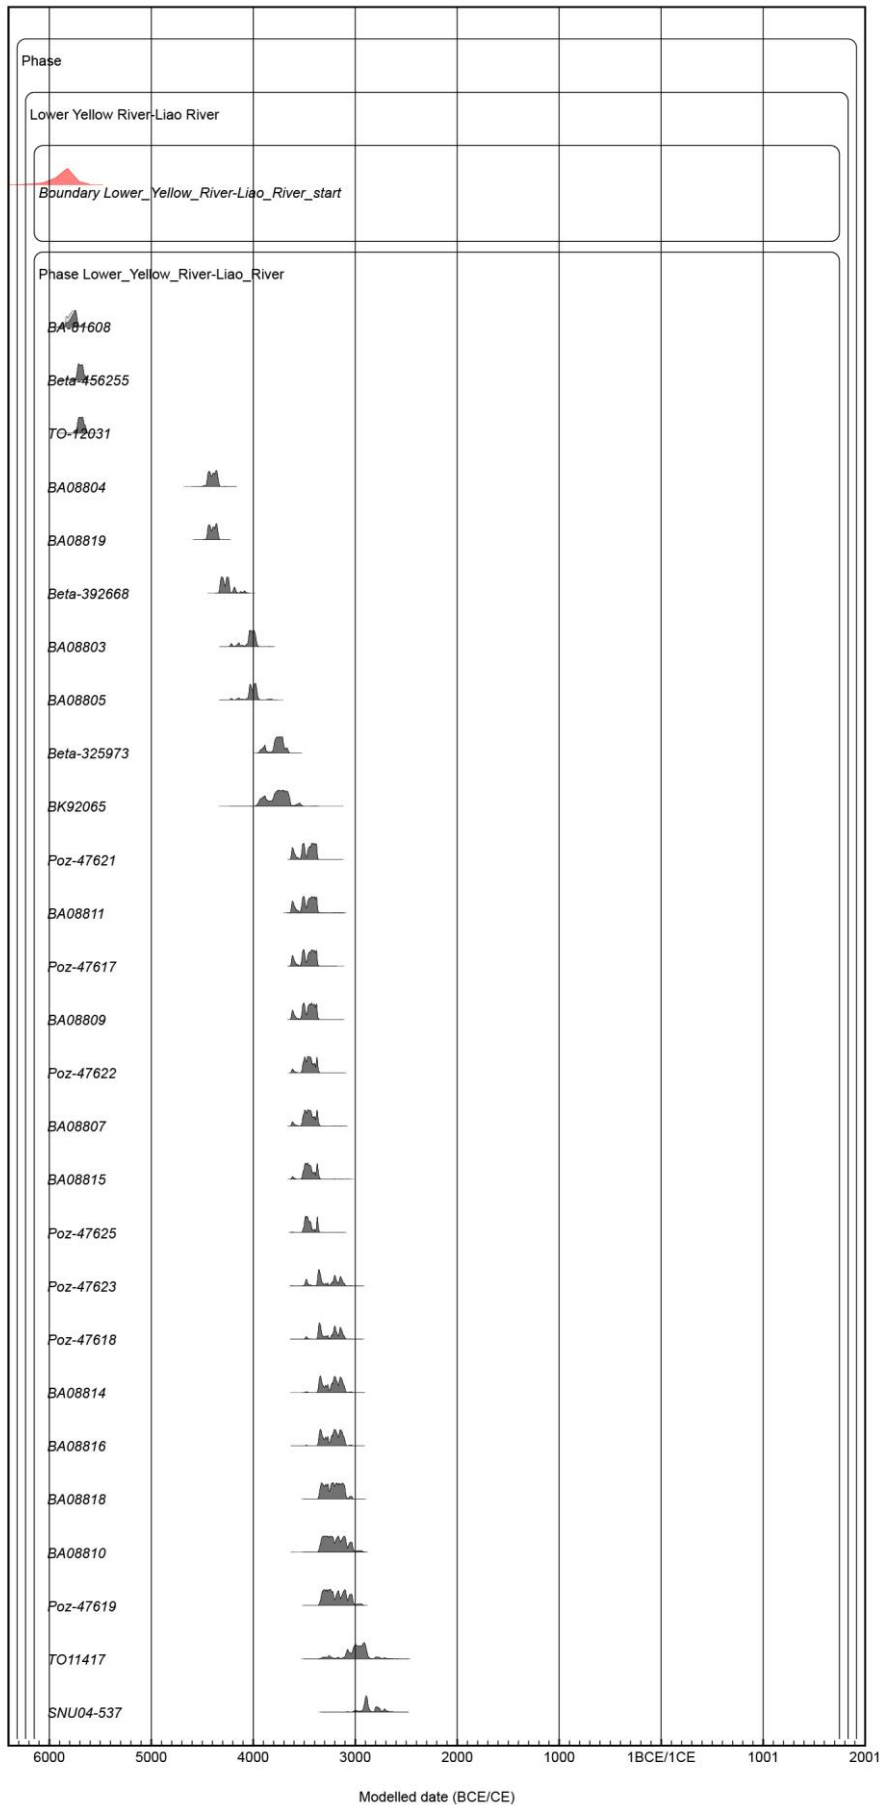

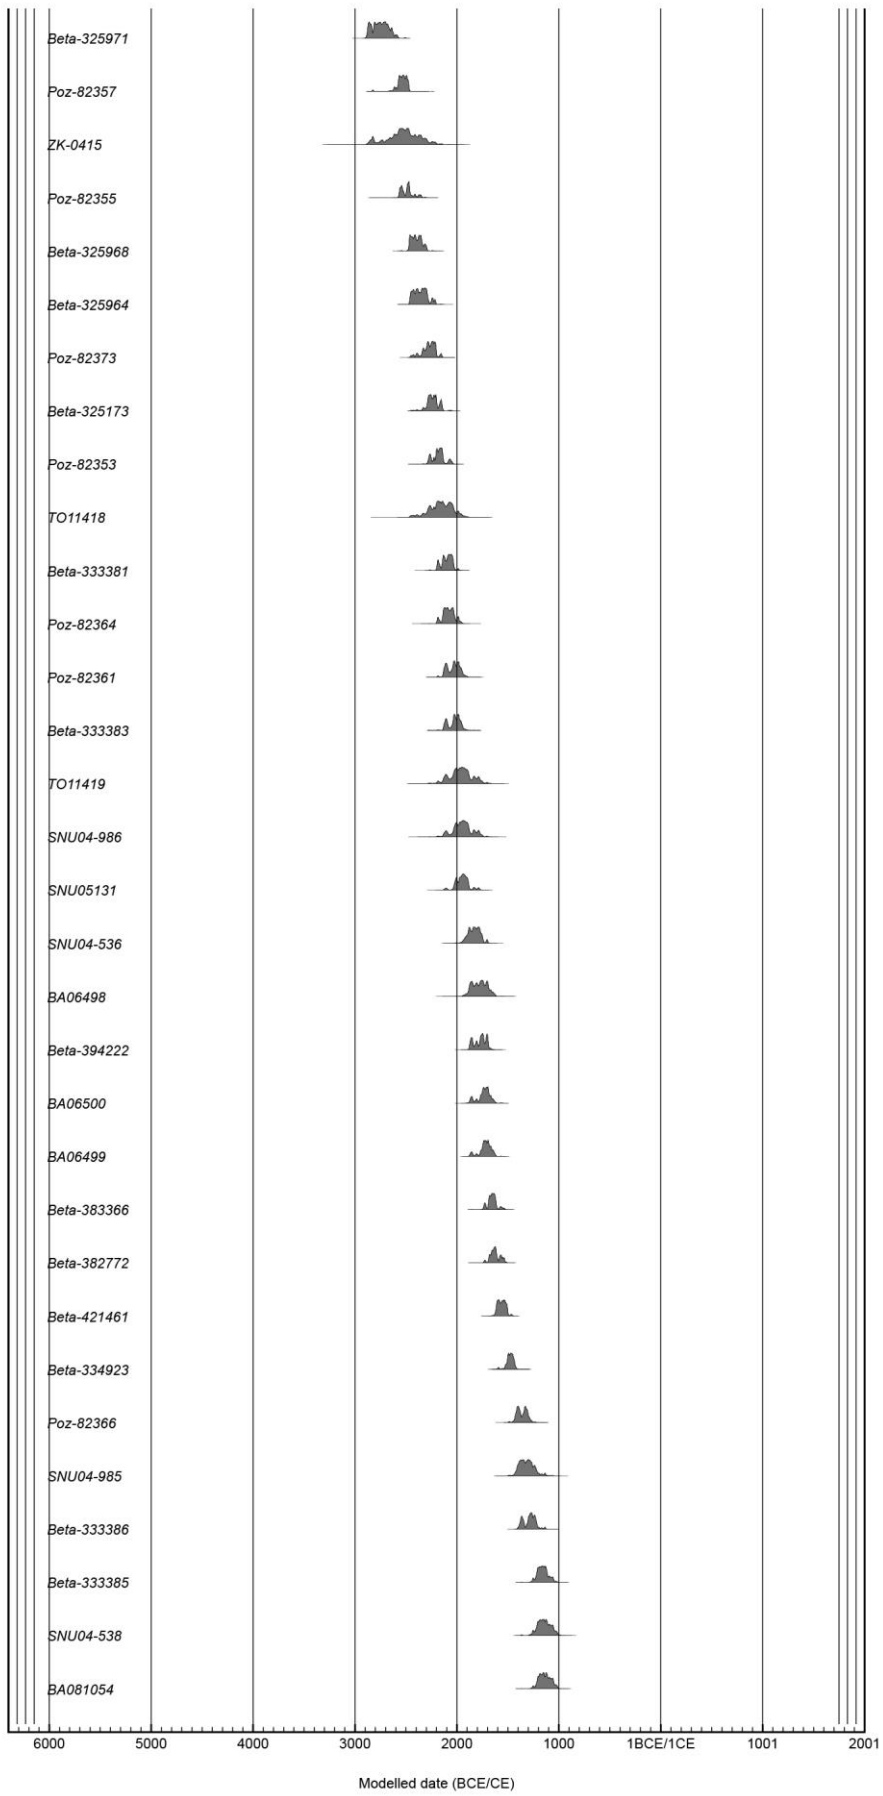

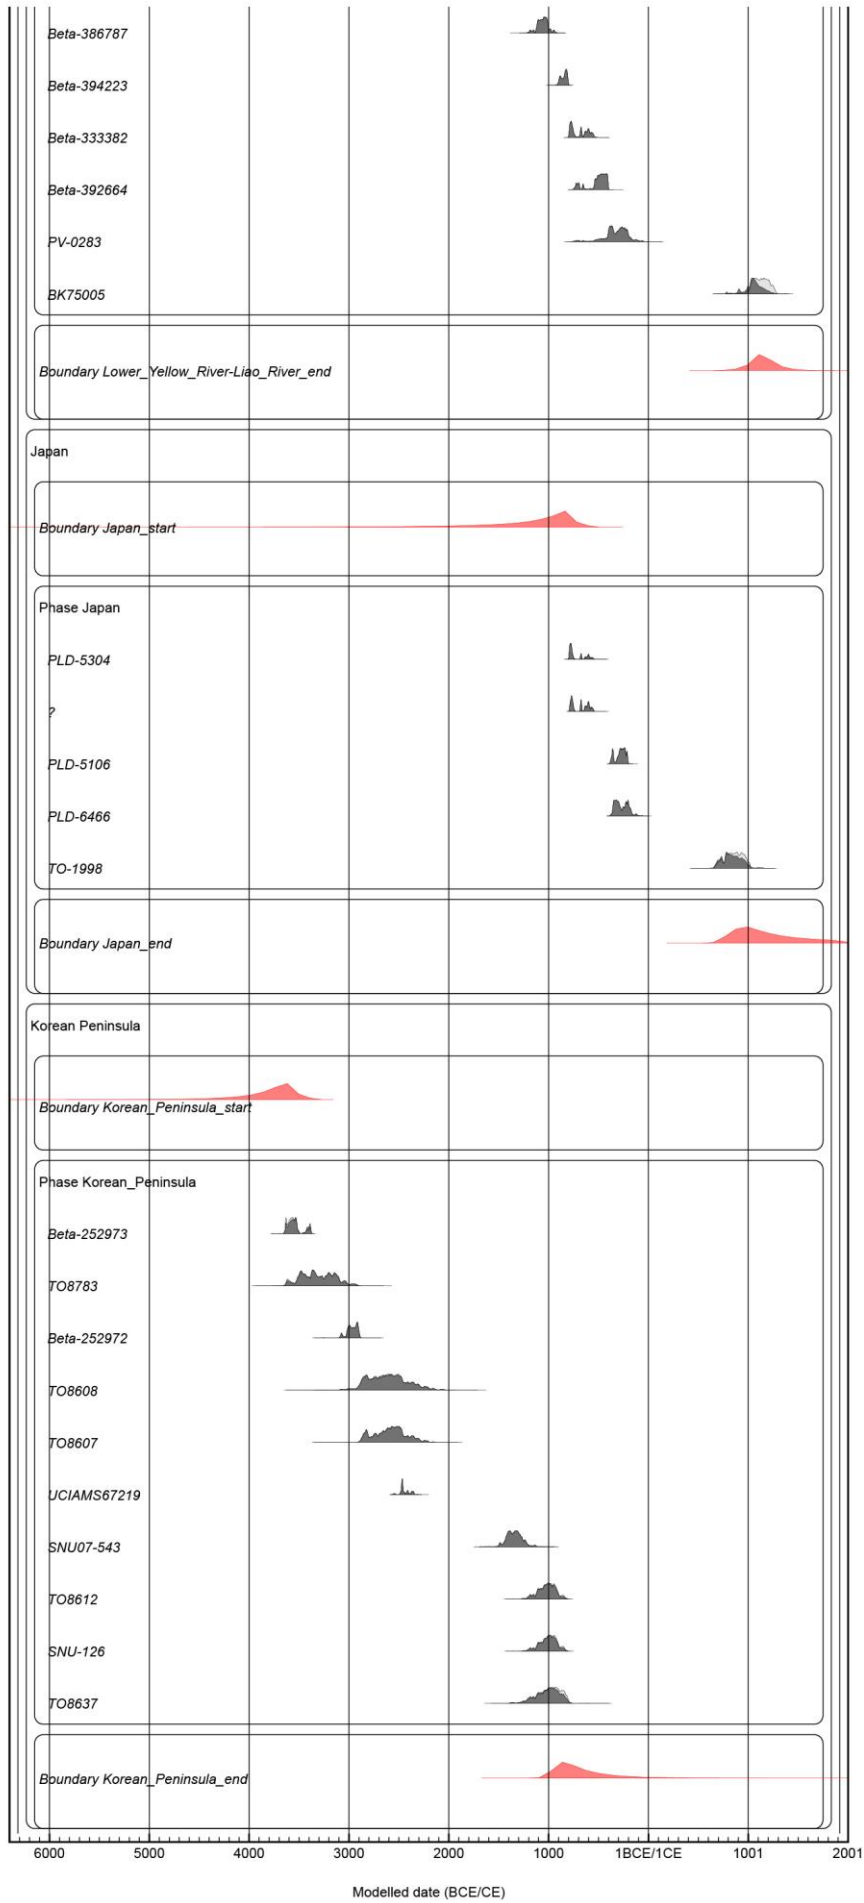

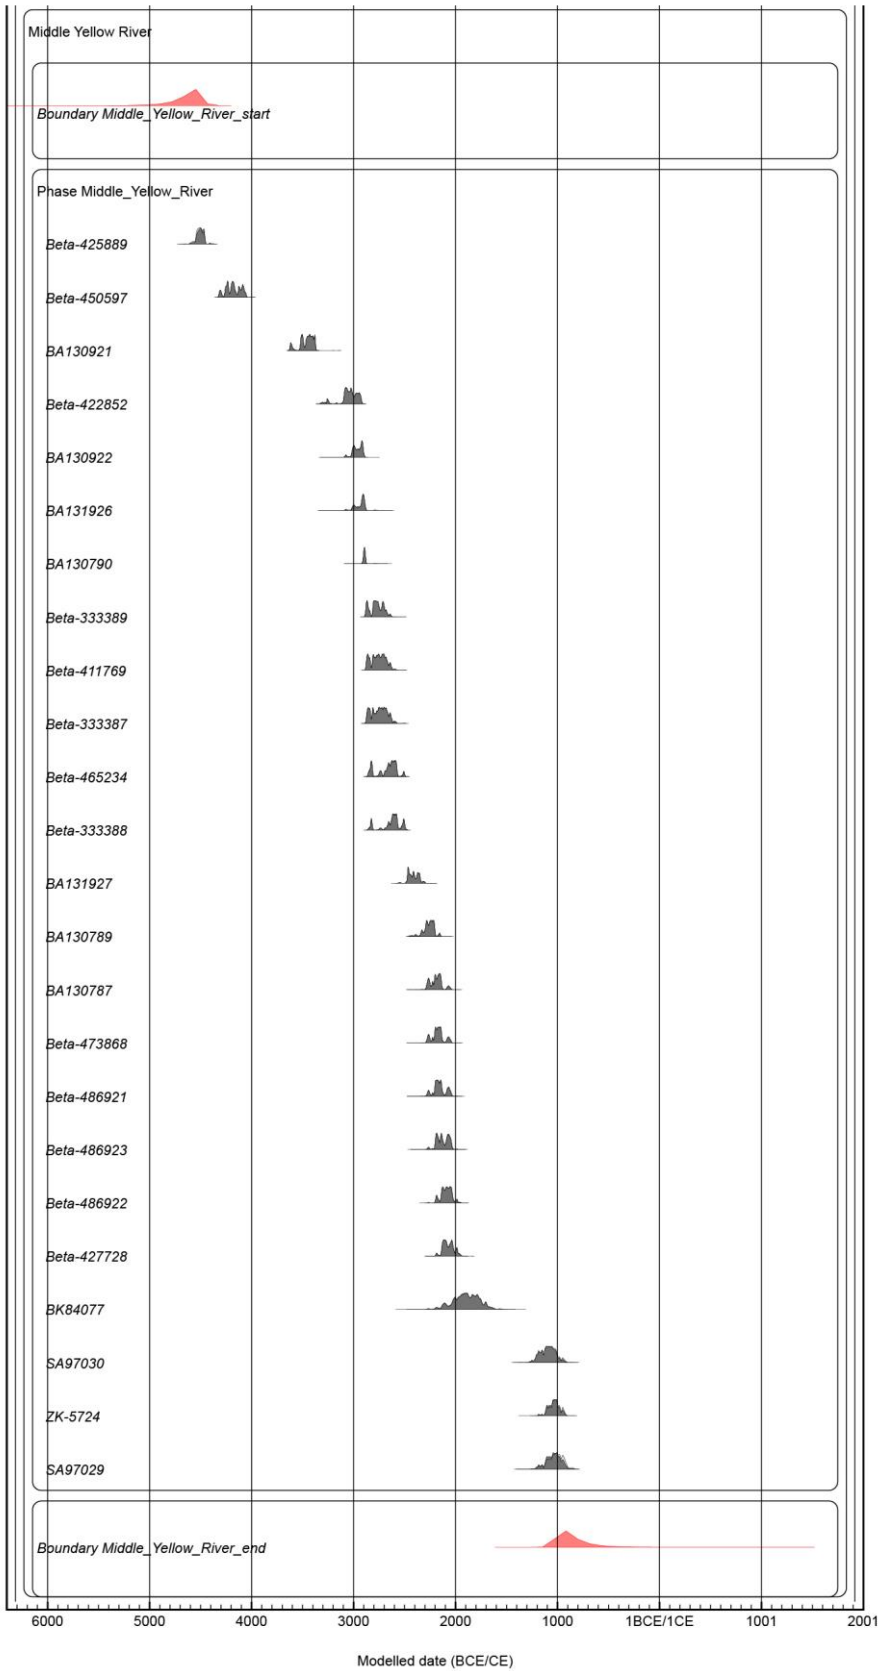



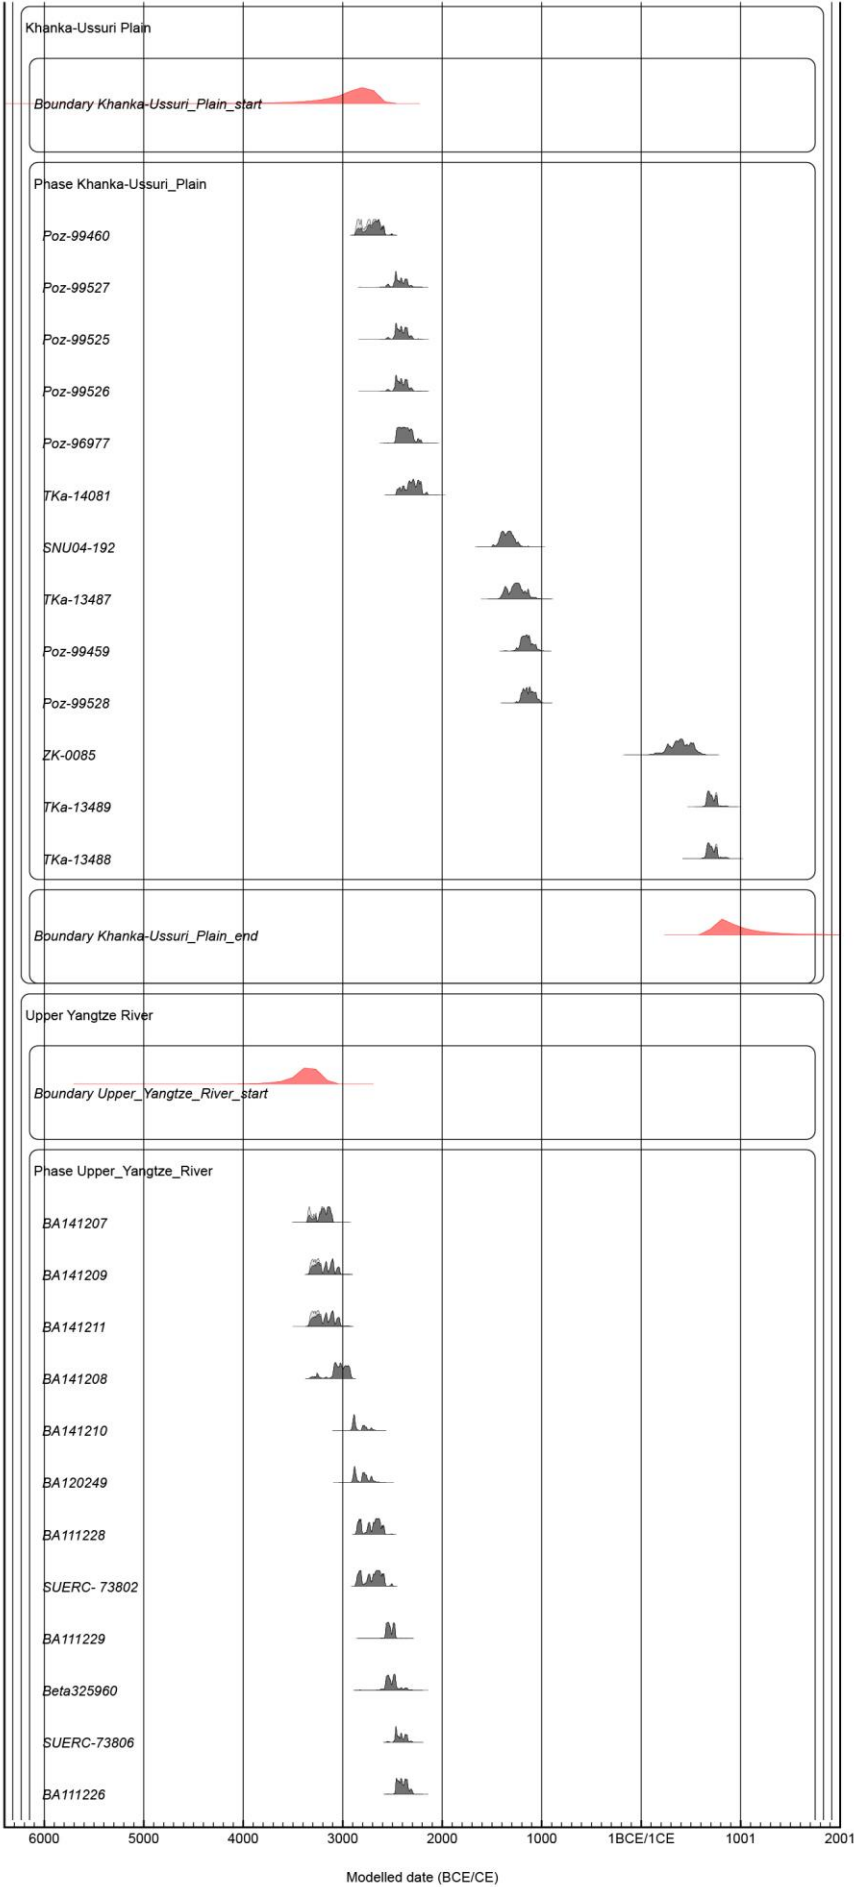

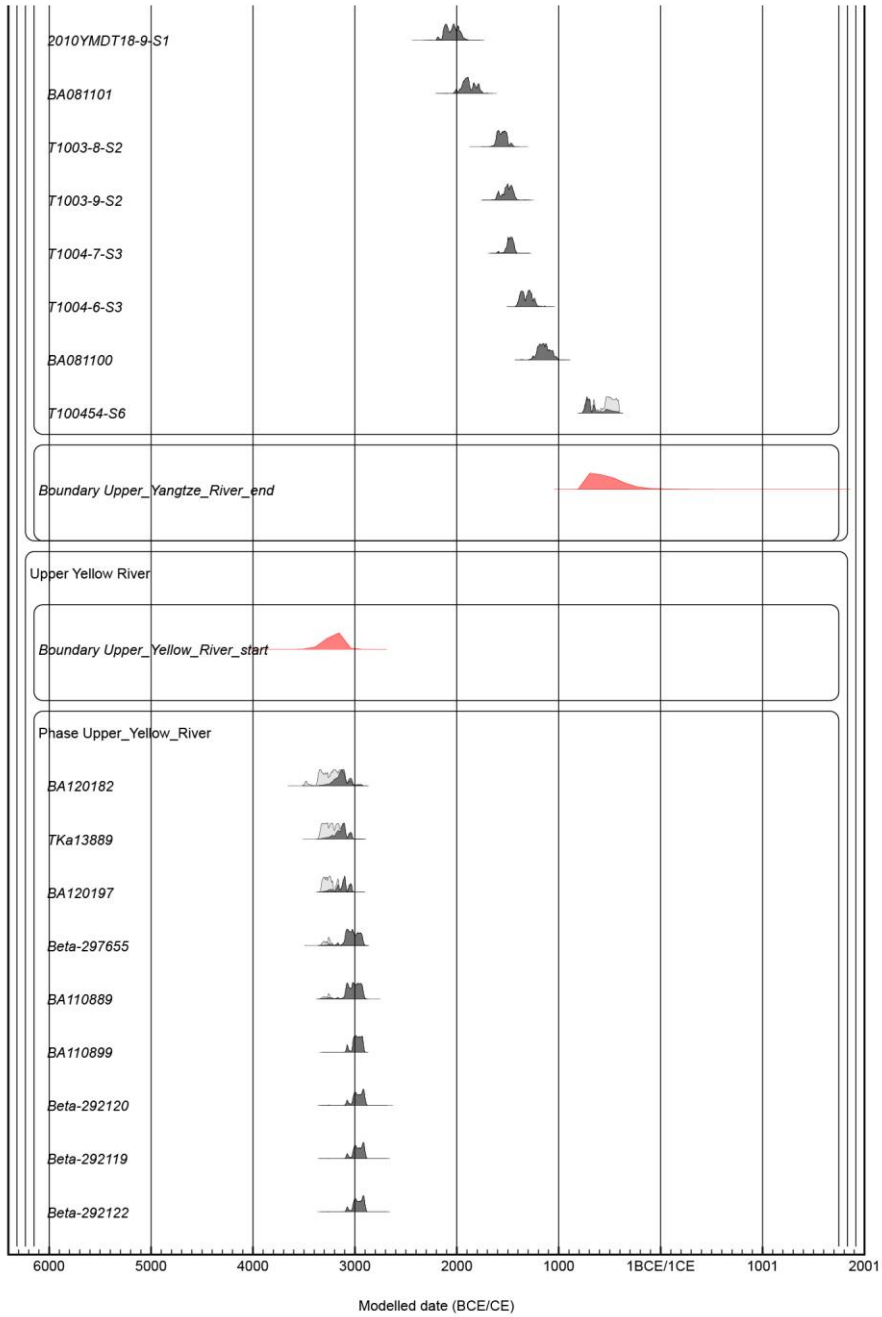

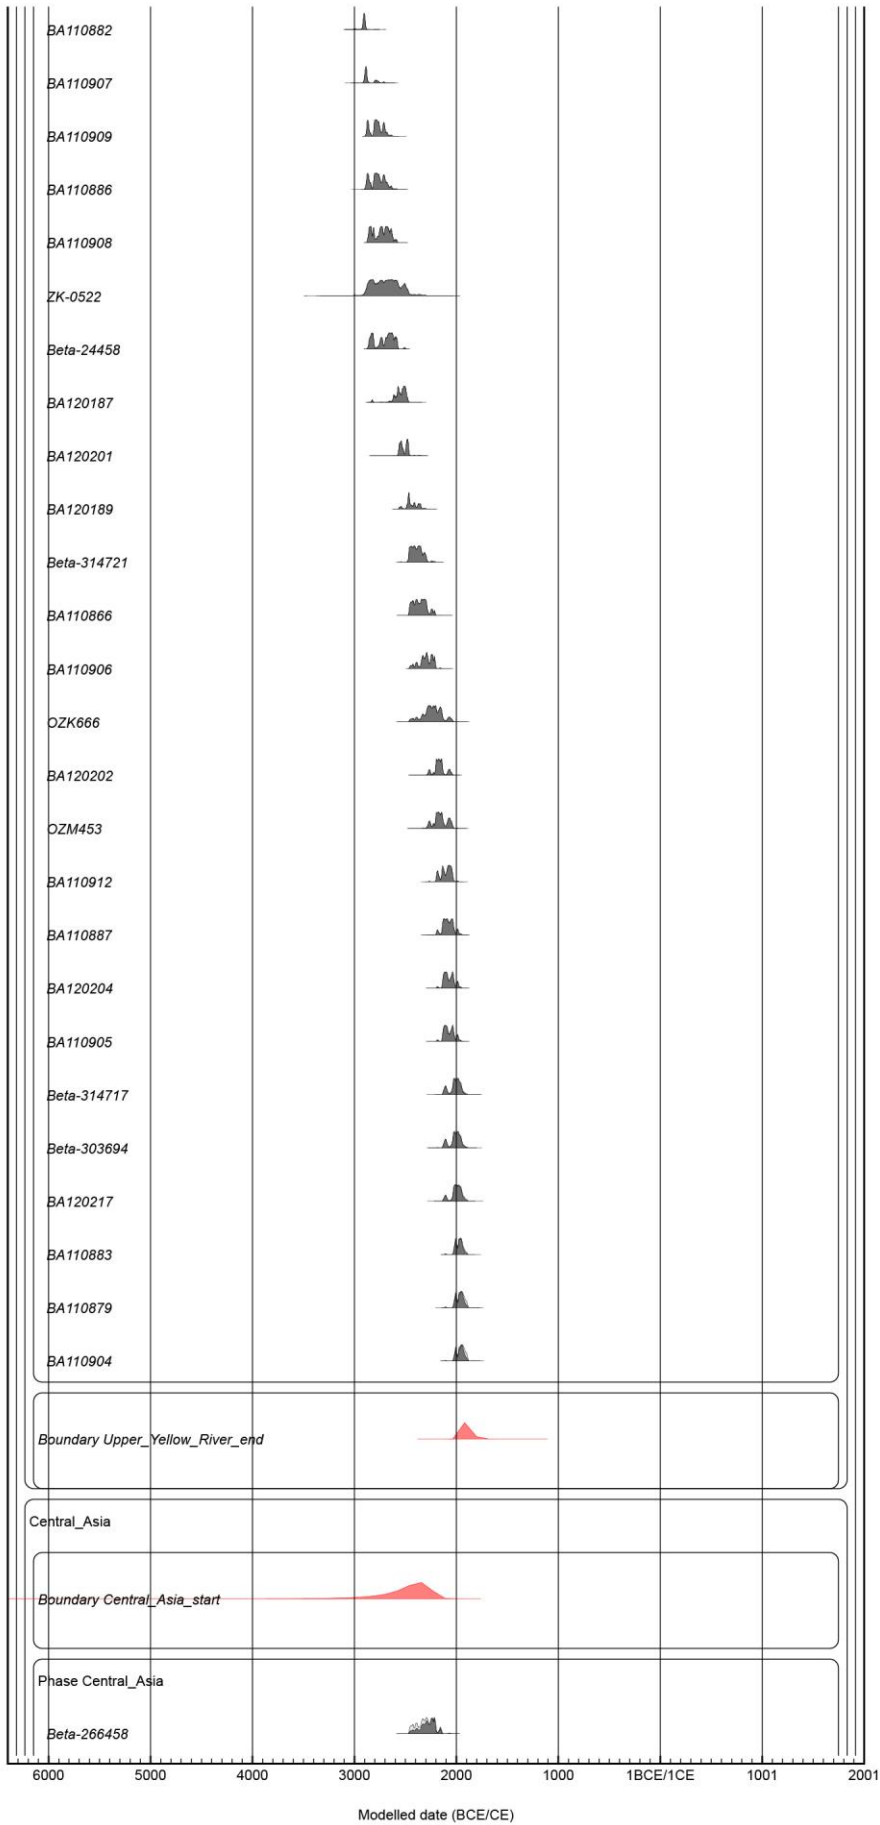

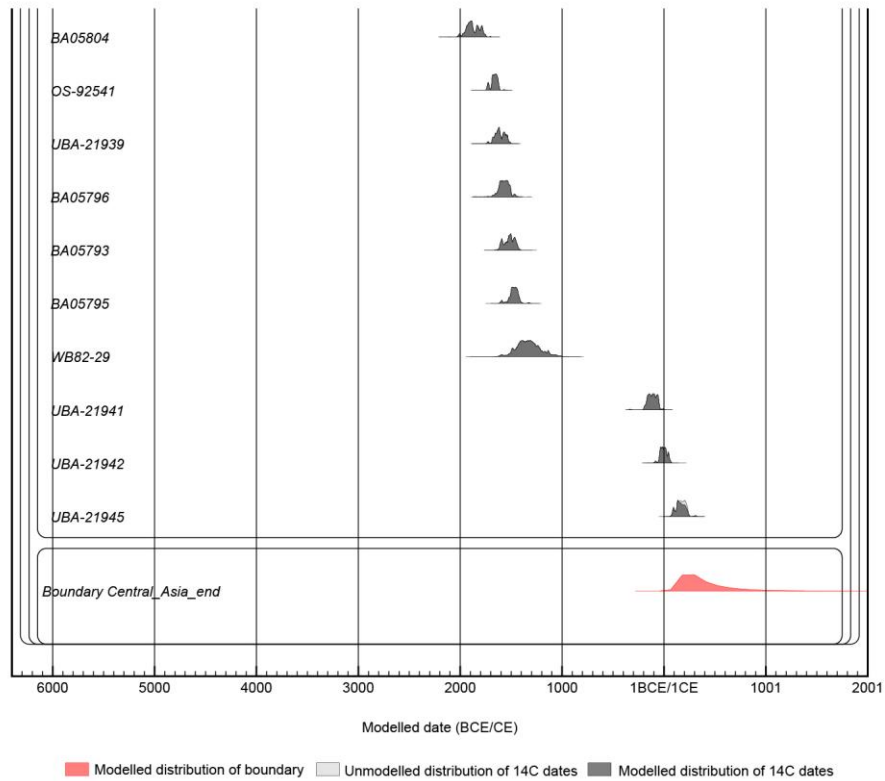

**Fig. S2. OxCal modeling results.** The results of Bayesian modelling applied to the compiled set of published (table S1) and newly (table S2) obtained millet  $^{14}\text{C}$  dates ( $n = 184$ ). Light grey and dark grey silhouettes represent unmodelled and modelled 95% probability distribution of  $^{14}\text{C}$  dates, respectively. Red silhouettes represent the modelled probability distribution of the boundaries.
